# Supplementary material for: Maintained Properties of Aged Dental Pulp Stem Cells for Superior Periodontal Tissue Regeneration
Source: PubMed Central journal article supplement (PMC6675537; doi:10.14336/ad.2018.0729), 2019-08-01
Supplement: AD-10-4-793-s.pdf [file AD-10-4-793-s.pdf]

Original Article

## **Maintained Properties of Aged Dental Pulp Stem Cells for Superior Periodontal Tissue Regeneration**

**Linsha Ma<sup>1,#</sup>, Jingchao Hu<sup>1,#</sup>, Yu Cao<sup>1</sup>, Yilin Xie<sup>1</sup>, Hua Wang<sup>2</sup>, Zhipeng Fan<sup>1</sup>, Chunmei Zhang<sup>1</sup>, Jinsong Wang<sup>1,3,\*</sup>, Chu-Tse Wu<sup>2,\*</sup>, Songlin Wang<sup>1,3,\*</sup>**

<sup>1</sup>Molecular Laboratory for Gene Therapy & Tooth Regeneration, Beijing Key Laboratory of Tooth Regeneration and Function Reconstruction, Capital Medical University, School of Stomatology, Beijing, China

<sup>2</sup>Department of Experimental Hematology, Beijing Institute of Radiation Medicine, Beijing, China

<sup>3</sup>Department of Biochemistry and Molecular Biology, Capital Medical University School of Basic Medical Sciences, Beijing, China

# SUPPLEMENTARY DATA

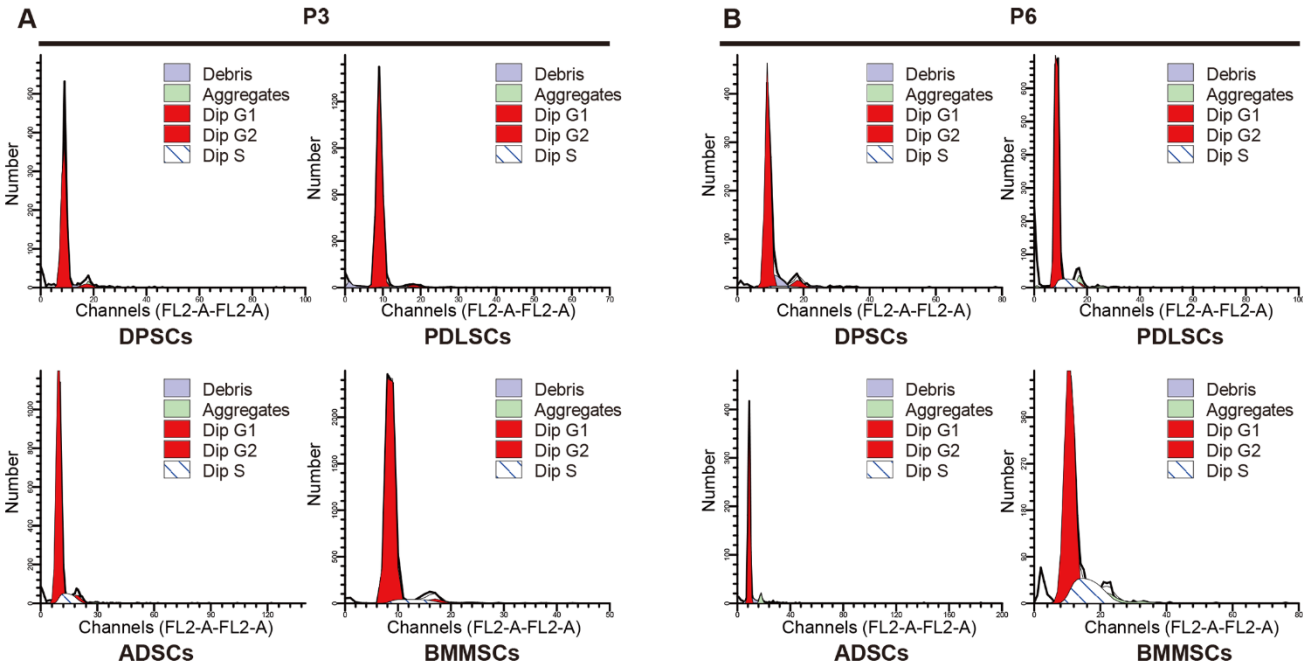

**Supplementary Figure 1.** Cell cycle analysis of DPSCs, PDLSCs, ADSCs and BMMSCs. **(A)** Cell cycle analysis of DPSCs, PDLSCs, ADSCs and BMMSCs at passage three. **(B)** Cell cycle analysis of DPSCs, PDLSCs, ADSCs and BMMSCs at passage six.

## SUPPLEMENTARY DATA

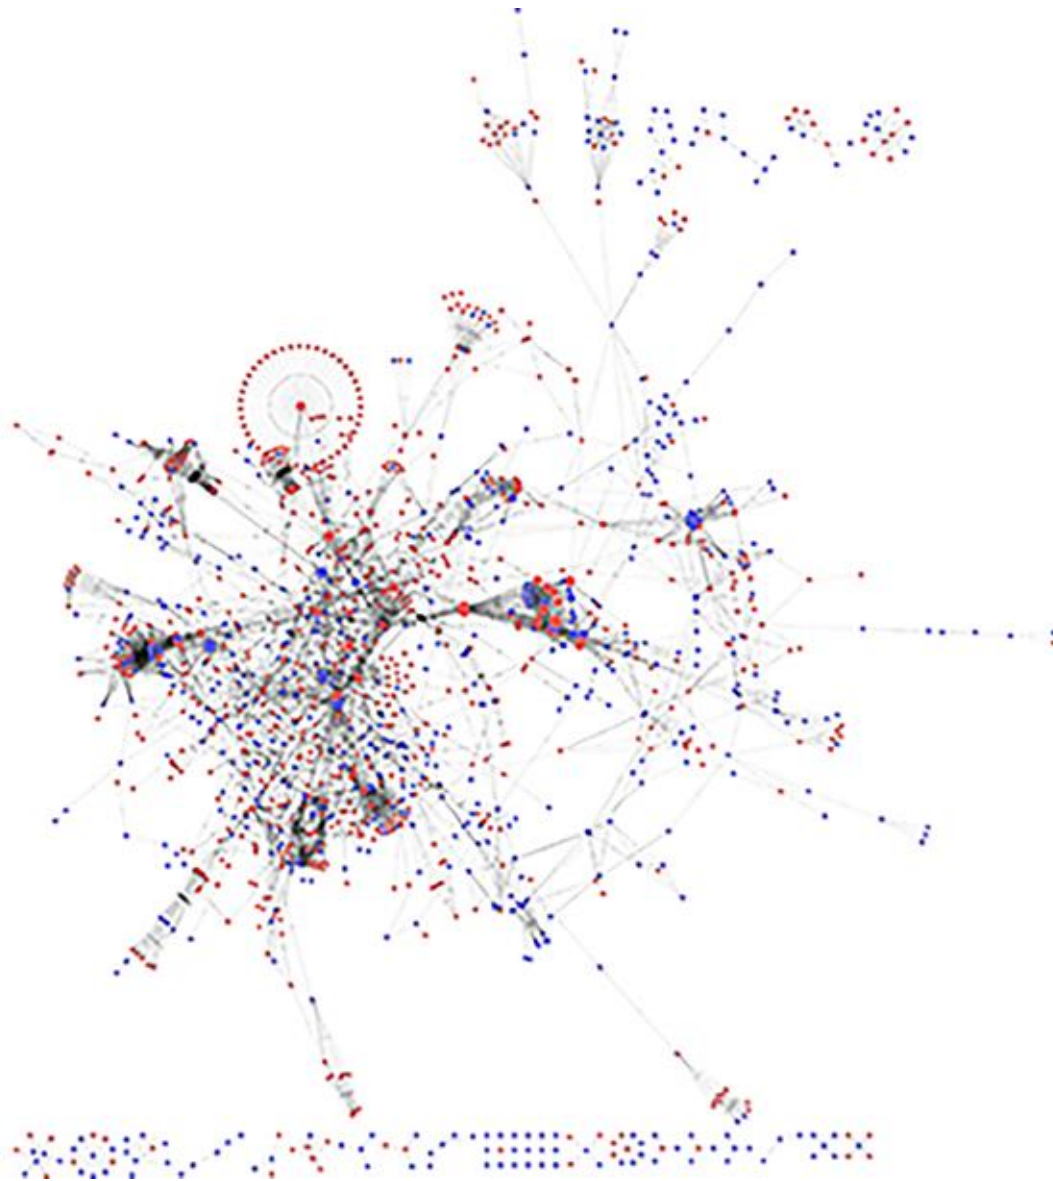

**Supplementary Figure 2.** Signal-net analysis of the most important candidate genes contributing to the characteristics of DPSCs and BMMSCs. The red represents the upregulated genes and the blue represents the downregulated genes.

# SUPPLEMENTARY DATA

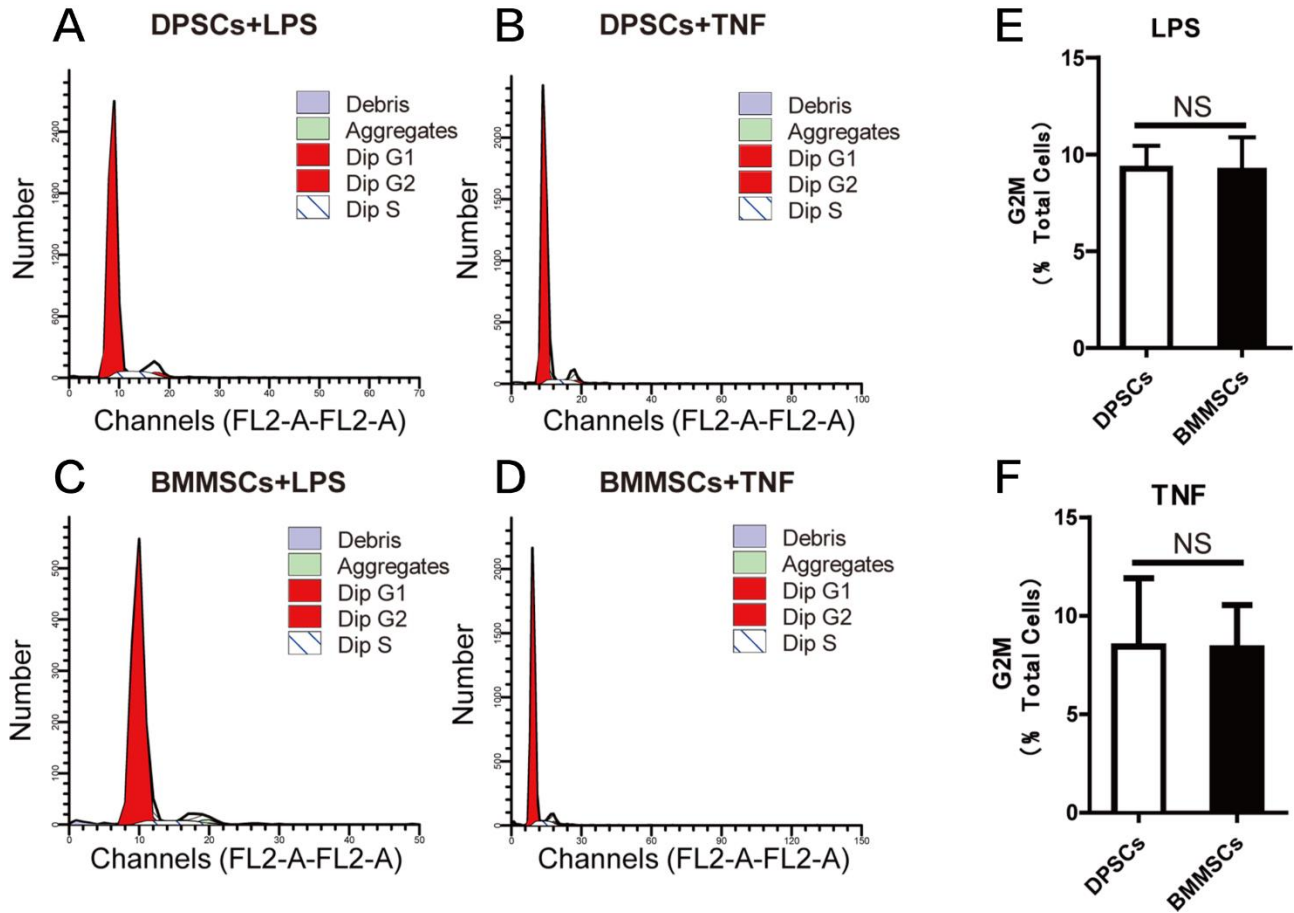

**Supplementary Figure 3.** Cell cycle analysis of DPSCs and BMMSCs under TNF $\alpha$  and LPS stimulation. **(A)** Cell cycle analysis of DPSCs under LPS stimulation. **(B)** Cell cycle analysis of DPSCs under TNF $\alpha$  stimulation. **(C)** Cell cycle analysis of BMMSCs under LPS stimulation. **(D)** Cell cycle analysis of BMMSCs under TNF $\alpha$  stimulation. **(E, F)** Quantitative analyses of percentage of G2 phase in DPSCs and BMMSCs under TNF $\alpha$  and LPS stimulation. Values are means  $\pm$  SDs. Student's t-tests were used to determine statistical significance. Error bars represent SDs (n = 10). NS: no significance.
